# Supplementary material
Source: MDPI journal article supplement (https://www.mdpi.com/2076-3298/11/4/67)
Supplement: s1 [file s1]

# Assessment of the Quality of Agricultural Soils in Manica Province (Mozambique)

Mário J. S. L. Pereira <sup>1,2</sup> and Joaquim Esteves da Silva <sup>2,\*</sup>

<sup>1</sup> Departamento de Ciências Naturais e Matemática, Faculdade de Ciências e Tecnologias, Universidade Licungo, P.O. Box 2025, Beira 2100, Moçambique; up202102062@edu.fc.up.pt

<sup>2</sup> Chemistry Research Unit (CIQUP), Institute of Molecular Sciences (IMS), Department of Geosciences, Environment and Territorial Planning, Faculty of Sciences, University of Porto, Rua do Campo Alegre s/n, 4169-007 Porto, Portugal

\* Correspondence: jcsilva@fc.up.pt; Tel.: +351-220-402-569

## Supplemental information

### 1. GPS coordinates and date of the soil sampling

#### Campaign 2021/2022

##### C1 – Manica (29/09/2021) – Before rainy season

| Subsample N° | Coordinates                          |
|--------------|--------------------------------------|
| 01           | S 19° 00' 09.6'' / E 032° 47' 23.1'' |
| 02           | S 19° 00' 09.5'' / E 032° 47' 23.7'' |
| 03           | S 19° 00' 09.0'' / E 032° 47' 23.9'' |
| 04           | S 19° 00' 08.6'' / E 032° 47' 24.6'' |
| 05           | S 19° 00' 01.8'' / E 032° 47' 26.5'' |
| 06           | S 19° 00' 00.5'' / E 032° 47' 26.1'' |
| 07           | S 18° 59' 59.2'' / E 032° 47' 25.7'' |
| 08           | S 18° 59' 54.3'' / E 032° 47' 25.9'' |
| 09           | S 18° 59' 58.1'' / E 032° 47' 24.9'' |
| 10           | S 18° 59' 57.2'' / E 032° 47' 23.8'' |
| 11           | S 18° 59' 56.6'' / E 032° 47' 23.5'' |

|    |                                    |
|----|------------------------------------|
| 12 | S 18° 59' 54.9" / E 032° 47' 22.0" |
| 13 | S 18° 59' 53.4" / E 032° 47' 21.6" |
| 14 | S 18° 59' 53.6" / E 032° 47' 22.5" |
| 15 | S 18° 59' 55.4" / E 032° 47' 23.1" |
| 16 | S 18° 59' 54.9" / E 032° 47' 25.1" |
| 17 | S 18° 59' 55.9" / E 032° 47' 25.3" |
| 18 | S 18° 59' 56.0" / E 032° 47' 24.1" |
| 19 | S 18° 59' 56.9" / E 032° 47' 24.7" |
| 20 | S 18° 59' 55.6" / E 032° 47' 25.1" |

**C2 – Manica (29/09/2021) – Before rainy season**

| <b>Subsample N°</b> | <b>Coordinates</b>                 |
|---------------------|------------------------------------|
| 01                  | S 18° 59' 31.3" / E 032° 46' 54.4" |
| 02                  | S 18° 59' 31.0" / E 032° 46' 55.4" |
| 03                  | S 18° 59' 30.3" / E 032° 46' 56.7" |
| 04                  | S 18° 59' 30.3" / E 032° 46' 55.4" |
| 05                  | S 18° 59' 30.4" / E 032° 46' 54.5" |
| 06                  | S 18° 59' 30.4" / E 032° 46' 53.6" |
| 07                  | S 18° 59' 29.5" / E 032° 46' 54.6" |
| 08                  | S 18° 59' 29.0" / E 032° 46' 55.3" |
| 09                  | S 18° 59' 28.5" / E 032° 46' 56.3" |
| 10                  | S 18° 59' 28.5" / E 032° 46' 55.3" |
| 11                  | S 18° 59' 28.4" / E 032° 46' 54.1" |
| 12                  | S 18° 59' 27.9" / E 032° 46' 52.8" |
| 13                  | S 18° 59' 27.1" / E 032° 46' 53.7" |
| 14                  | S 18° 59' 26.5" / E 032° 46' 54.3" |
| 15                  | S 18° 59' 25.6" / E 032° 46' 55.0" |

**C3 – Sussundenga (30/09/2021) – Before rainy season**

| Subsample N° | Coordinates                                                      |
|--------------|------------------------------------------------------------------|
| 01           | -19,475274 S 19° 28' 31.0269'' / 33,376158 E 33° 22' 34.16776''  |
| 02           | -19,475398 S 19° 28' 31.4871'' / 33,375954 E 33° 22' 33.57768''  |
| 03           | -19,475335 S 19° 28' 31.34928'' / 33,375953 E 33° 22' 33.4308''  |
| 04           | -19,475239 S 19° 28' 30.88848'' / 33,375810 E 33° 22' 32.916''   |
| 05           | -19,475086 S 19° 28' 30.2844'' / 33,375837 E 33° 22' 33.02546''  |
| 06           | -19,479955 S 19° 28' 29.8346'' / 33,375826 E 33° 22' 33.29796''  |
| 07           | -19,474836 S 19° 28' 29.30808'' / 33,375762 E 33° 22' 32.529''   |
| 08           | -19,474897 S 19° 28' 29.01684'' / 33,375581 E 33° 22' 32.09124'' |
| 09           | -19,474717 S 19° 28' 29.20188'' / 33,375361 E 33° 22' 31.30068'' |
| 10           | -19,474786 S 19° 28' 29.23716'' / 33,375355 E 33° 22' 31.27764'' |

#### C4 – Sussundenga (04/10/2021) – Before rainy season

| Subsample N° | Coordinates                                                      |
|--------------|------------------------------------------------------------------|
| 01           | -19,532971 S 19° 31' 58,70532'' / 33,128006 E 33° 7' 40,82232''  |
| 02           | -19,532788 S 19° 31' 58,0422'' / 33,127784 E 33° 7' 40,02204''   |
| 03           | -19,532790 S 19° 31' 57,61416'' / 33,127849 E 33° 7' 40,25424''  |
| 04           | -19,532536 S 19° 31' 57,15372'' / 33,127892 E 33° 7' 40,41012''  |
| 05           | -19,5325318 S 19° 31' 56,62884'' / 33,127699 E 33° 7' 39,7164''  |
| 06           | -19,532516 S 19° 31' 56,56152'' / 33,127769 E 33° 7' 40,63268''  |
| 07           | -19,532301 S 19° 31' 56,1198'' / 33,127845 E 33° 7' 40,28916''   |
| 08           | -19,532358 S 19° 31' 56,2296'' / 33,128013 E 33° 7' 40,84537''   |
| 09           | -19,532427 S 19° 31' 56,64288'' / 33,127938 E 33° 7' 40,5768''   |
| 10           | -19,532382 S 19° 31' 56,48268'' / 33,127897 E 33° 7' 40, 5274''  |
| 11           | -19,532593 S 19° 31' 57,23148'' / 33,128044 E 33° 7' 41,1444''   |
| 12           | -19,532420 S 19° 31' 56,79156'' / 33,128179 E 33° 7' 41,44640''  |
| 13           | -19,532645 S 19° 31' 57,45108'' / 33,128315 E 33° 7' 41,01144''  |
| 14           | -19,532685 S 19° 31' 57,47232'' / 33,128416 E 33° 7' 42,29832''  |
| 15           | -19,532646 S 19° 31' 57,48204'' / 33,128418 E 33° 7' 42, 23236'' |

**C5 – Sussundenga (04/10/2021) – Before rainy season**

| <b>Subsample N°</b> | <b>Coordinates</b>                                           |
|---------------------|--------------------------------------------------------------|
| 01                  | -19,529334 S 19°31'45,6942" // 33,126550 E 33°7' 35,39385"   |
| 02                  | -19,529911 S 19°31'46,09344" // 33,126526 E 33°7' 35,49252"  |
| 03                  | -19,529464 S 19°31'46,24176" // 33,126656 E 33°7' 35,96052"  |
| 04                  | -19,529504 S 19°31'46,5636" // 33,126857 E 33°7' 36, 6852"   |
| 05                  | -19,529406 S 19°31'45,58896" // 33,126872 E 33°7' 36,73848"  |
| 06                  | -19,529321 S 19°31'45,61644" // 33,126829 E 33°7' 36, 59232" |
| 07                  | -19,529396 S 19°31'46,2324" // 33,127034 E 33°7' 37,3206"    |
| 08                  | -19,529402 S 19°31'46,12944" // 33,127245 E 33°7' 38,08164"  |
| 09                  | -19,529384 S 19°31'45, 51888" // 33,127220 E 33°7' 37,9884"  |
| 10                  | -19,529451 S 19°31'45,73632" // 33,127387 E 33°7' 38,5914"   |
| 11                  | -19,529409 S 19°31'45,86808" // 33,127495 E 33°7' 38,98308"  |
| 12                  | -19,529441 S 19°31'46, 6914" // 33,127616 E 33°7' 39,4194"   |
| 13                  | -19,529607 S 19°31'46,67448" // 33,127712 E 33°7' 39,8118"   |
| 14                  | -19,529614 S 19°31'46,06536" // 33,127820 E 33°7' 40,21968"  |
| 15                  | -19,529444 S 19°31'45,95768" // 33,127688 E 33°7' 40,45674"  |

**C1 – Manica (14/04/2022) – After rainy season**

| <b>Subsample N°</b> | <b>Coordinates</b>                   |
|---------------------|--------------------------------------|
| 01                  | S 19° 00' 09.6'' / E 032° 47' 22.9'' |
| 02                  | S 19° 00' 09.3'' / E 032° 47' 23.8'' |
| 03                  | S 19° 00' 09.0'' / E 032° 47' 24.1'' |
| 04                  | S 19° 00' 02.8'' / E 032° 47' 27.5'' |
| 05                  | S 19° 00' 02.3'' / E 032° 47' 27.2'' |
| 06                  | S 19° 00' 01.7'' / E 032° 47' 26.5'' |
| 07                  | S 19° 00' 01.1'' / E 032° 47' 26.6'' |
| 08                  | S 19° 00' 01.0'' / E 032° 47' 25.8'' |
| 09                  | S 19° 00' 01.3'' / E 032° 47' 24.8'' |
| 10                  | S 19° 00' 00.5'' / E 032° 47' 25.5'' |

|    |                                      |
|----|--------------------------------------|
| 11 | S 18° 59' 59.6'' / E 032° 47' 26.3'' |
| 12 | S 18° 59' 59.3'' / E 032° 47' 25.5'' |
| 13 | S 18° 59' 59.4'' / E 032° 47' 24.4'' |
| 14 | S 18° 59' 58.0'' / E 032° 47' 24.3'' |
| 15 | S 18° 59' 56.7'' / E 032° 47' 24.4'' |
| 16 | S 18° 59' 56.7'' / E 032° 47' 22.5'' |
| 17 | S 18° 59' 55.4'' / E 032° 47' 22.0'' |
| 18 | S 18° 59' 54.2'' / E 032° 47' 21.9'' |
| 19 | S 18° 59' 53.0'' / E 032° 47' 21.9'' |
| 20 | S 18° 59' 54.9'' / E 032° 47' 23.8'' |

**C2 – Manica (14/04/2022) – After rainy season**

| Subsample N° | Coordinates                          |
|--------------|--------------------------------------|
| 01           | S 18° 59' 31.0'' / E 032° 46' 54.3'' |
| 02           | S 18° 59' 30.6'' / E 032° 46' 55.3'' |
| 03           | S 18° 59' 30.1'' / E 032° 46' 56.6'' |
| 04           | S 18° 59' 29.8'' / E 032° 46' 55.9'' |
| 05           | S 18° 59' 29.7'' / E 032° 46' 55.0'' |
| 06           | S 18° 59' 29.7'' / E 032° 46' 54.2'' |
| 07           | S 18° 59' 29.7'' / E 032° 46' 53.3'' |
| 08           | S 18° 59' 29.0'' / E 032° 46' 54.4'' |
| 09           | S 18° 59' 28.5'' / E 032° 46' 55.5'' |
| 10           | S 18° 59' 28.1'' / E 032° 46' 56.2'' |
| 11           | S 18° 59' 28.4'' / E 032° 46' 55.5'' |
| 12           | S 18° 59' 28.0'' / E 032° 46' 54.3'' |
| 13           | S 18° 59' 27.9'' / E 032° 46' 53.1'' |
| 14           | S 18° 59' 27.3'' / E 032° 46' 54.1'' |
| 15           | S 18° 59' 26.6'' / E 032° 46' 55.4'' |

**C3 – Sussundenga (26/04/2022) – After rainy season**

| Subsample N° | Coordinates                                                          |
|--------------|----------------------------------------------------------------------|
| 01           | -19, 475214 S 19° 28' 30. 76896'' / 33, 376042 E 33° 22' 33. 74376'' |
| 02           | -19, 475350 S 19° 28' 31. 30605'' / 33, 376123 E 33° 22' 34. 04388'' |
| 03           | -19, 47584 S 19° 28' 31. 55084'' / 33, 378989 E 33° 22' 33. 56148''  |
| 04           | -19, 475425 S 19° 28' 31. 81368'' / 33, 375809 E 33° 22' 32. 90952'' |
| 05           | -19, 475411 S 19° 28' 31. 5844'' / 33, 375742 E 33° 22' 32. 6604''   |
| 06           | -19, 475089 S 19° 28' 30. 7938'' / 33, 375622 E 33° 22' 32. 25072''  |
| 07           | -19, 47560 S 19° 28' 30. 20156'' / 33, 375534 E 33° 22' 31. 8416''   |
| 08           | -19, 473221 S 19° 28' 30. 59688'' / 33, 375392 E 33° 22' 31. 41048'' |
| 09           | -19, 475330 S 19° 28' 30. 41004'' / 33, 37576 E 33° 22' 30. 63396''  |
| 10           | -19, 475111 S 19° 28' 30. 02230'' / 33, 37510 E 33° 22' 30. 41724''  |

#### C4 – Sussundenga (26/04/2022) – After rainy season

| Subsample N° | Coordinates                                                        |
|--------------|--------------------------------------------------------------------|
| 01           | -19, 532956 S 19° 31' 58, 64136" / 33, 127765 E 33° 7' 39, 85505"  |
| 02           | -19, 532769 S 19° 31' 58, 08896" / 33, 127808 E 33° 7' 40,11204"   |
| 03           | -19, 532805 S 19° 31' 58, 14556" / 33, 127997 E 33° 7' 40,79568"   |
| 04           | -19, 532552 S 19° 31' 57. 43488" / 33, 128078 E 33° 7' 41, 0808"   |
| 05           | -19, 532820 S 19° 31' 58, 98776" / 33, 128070 E 33° 7' 41, 05344"  |
| 06           | -19, 532644 S 19° 31' 57, 4914" / 33, 128152 E 33° 7' 41, 34618"   |
| 07           | -19, 532645 S 19° 31' 57, 92952" / 33, 128232 E 33° 7' 41, 6641"   |
| 08           | -19, 532749 S 19° 31' 57, 99648" / 33, 128194 E 33° 7' 41, 52036"  |
| 09           | -19, 532704 S 19° 31' 58, 2244" / 33, 128023 E 33° 7' 41, 88244"   |
| 10           | -19, 53294 S 19° 31' 58, 0224" / 33, 127948 E 33° 7' 40, 54836"    |
| 11           | -19, 532991 S 19° 31' 58, 953" / 33, 127797 E 33° 7' 40, 07721"    |
| 12           | -19, 532797 S 19° 31' 58, 17396" / 33, 128380 E 33° 7' 42, 19144"  |
| 13           | -19, 532634 S 19° 31' 57, 61812" / 33, 128484 E 33° 7' 42, 54096"  |
| 14           | -19, 532682 S 19° 31' 57, 2376" / 33, 128312 E 33° 7' 41, 92392"   |
| 15           | -19, 532736 S 19° 31' 57, 85882" / 33, 1283340 E 33° 7' 41, 17986" |

**C5 – Sussundenga (26/04/2022) – After rainy season**

| <b>Subsample N°</b> | <b>Coordinates</b>                                              |
|---------------------|-----------------------------------------------------------------|
| 01                  | -19,529485 S 19°31'45,88044" // 33, 126468 E 33°7' 35, 28372"   |
| 02                  | -19,529326 S 19°31'45, 82384" // 33, 126596 E 33°7' 35, 74632"  |
| 03                  | -19,529396 S 19°31'46, 40152" // 33, 126585 E 33°7' 35, 70708"  |
| 04                  | -19, 529548 S 19°31'46, 25292" // 33, 126673 E 33°7' 36, 10668" |
| 05                  | -19, 5295618 S 19°31'46,74576" // 33, 126613 E 33°7' 35, 58224" |
| 06                  | -19, 5295590 S 19°31'46, 52436" // 33,126835 E 33°7' 36, 62638" |
| 07                  | -19, 529224 S 19°31'45, 90444" // 33, 126839 E 33°7' 36, 64272" |
| 08                  | -19, 529418 S 19°31'45, 26836" // 33, 126840 E 33°7' 36, 4458"  |
| 09                  | -19, 529269 S 19°31'45, 87636" // 33, 126990 E 33°7' 37, 26264" |
| 10                  | -19, 529496 S 19°31'46, 30512" // 33, 127126 E 33°7' 37,69104"  |
| 11                  | -19, 529325 S 19°31'45, 65496" // 33, 127179 E 33°7' 37, 84476" |
| 12                  | -19, 529357 S 19°31'45, 6978" // 33, 127347 E 33°7' 38, 4996"   |
| 13                  | -19,529221 S 19°31'45, 10956" // 33, 127314 E 33°7' 38, 33044"  |
| 14                  | -19, 529328 S 19°31'45, 76548" // 33, 127107 E 33°7' 38, 83044" |
| 15                  | -19, 529416 S 19°31'45, 82125" // 33, 127436 E 33°7' 38, 85424" |

**Campaign 2022/2023****C1 – Manica (23/09/2022) – Before rainy season**

| <b>Subsample N°</b> | <b>Coordinates</b>                   |
|---------------------|--------------------------------------|
| 01                  | S 19° 00' 10.5'' / E 032° 47' 23.0'' |
| 02                  | S 19° 00' 09.4'' / E 032° 47' 23.4'' |
| 03                  | S 19° 00' 08.8'' / E 032° 47' 24.5'' |
| 04                  | S 19° 00' 07.0'' / E 032° 47' 27.8'' |
| 05                  | S 19° 00' 02.5'' / E 032° 47' 27.1'' |
| 06                  | S 19° 00' 01.7'' / E 032° 47' 26.3'' |
| 07                  | S 18° 00' 00.9'' / E 032° 47' 26.7'' |
| 08                  | S 18° 00' 00.6'' / E 032° 47' 25.6'' |

|    |                                      |
|----|--------------------------------------|
| 09 | S 18° 59' 59.9'' / E 032° 47' 26.0'' |
| 10 | S 18° 59' 59.3'' / E 032° 47' 26.0'' |
| 11 | S 18° 59' 59.3'' / E 032° 47' 25.4'' |
| 12 | S 18° 59' 59.5'' / E 032° 47' 24.4'' |
| 13 | S 18° 59' 58.5'' / E 032° 47' 24.1'' |
| 14 | S 18° 59' 57.8'' / E 032° 47' 24.5'' |
| 15 | S 18° 59' 57.4'' / E 032° 47' 23.3'' |
| 16 | S 18° 59' 56.7'' / E 032° 47' 22.8'' |
| 17 | S 18° 59' 55.8'' / E 032° 47' 22.4'' |
| 18 | S 18° 59' 54.3'' / E 032° 47' 22.1'' |
| 19 | S 18° 59' 54.7'' / E 032° 47' 23.3'' |
| 20 | S 18° 59' 55.2'' / E 032° 47' 24.6'' |

**C2 – Manica (23/09/2022) – Before rainy season**

| <b>Subsample N°</b> | <b>Coordinates</b>                   |
|---------------------|--------------------------------------|
| 01                  | S 18° 59' 31.2'' / E 032° 46' 54.5'' |
| 02                  | S 18° 59' 30.8'' / E 032° 46' 55.3'' |
| 03                  | S 18° 59' 30.3'' / E 032° 46' 56.5'' |
| 04                  | S 18° 59' 30.1'' / E 032° 46' 55.9'' |
| 05                  | S 18° 59' 30.1'' / E 032° 46' 54.9'' |
| 06                  | S 18° 59' 30.2'' / E 032° 46' 53.8'' |
| 07                  | S 18° 59' 29.7'' / E 032° 46' 54.4'' |
| 08                  | S 18° 59' 29.0'' / E 032° 46' 55.2'' |
| 09                  | S 18° 59' 28.4'' / E 032° 46' 56.0'' |
| 10                  | S 18° 59' 28.5'' / E 032° 46' 55.1'' |
| 11                  | S 18° 59' 28.7'' / E 032° 46' 54.1'' |
| 12                  | S 18° 59' 29.1'' / E 032° 46' 53.3'' |
| 13                  | S 18° 59' 28.3'' / E 032° 46' 53.4'' |
| 14                  | S 18° 59' 27.5'' / E 032° 46' 54.4'' |
| 15                  | S 18° 59' 27.1'' / E 032° 46' 55.2'' |



**C3 – Sussundenga (14/10/2022) – Before rainy season**

| <b>Subsample N°</b> | <b>Coordinates</b>                                               |
|---------------------|------------------------------------------------------------------|
| 01                  | -19,475075 S 19° 28' 30,20736 '' / 33,376327 E 33° 22' 34,7916'' |
| 02                  | -19,475116 S 19° 28' 30,3852'' / 33,376214 E 33° 22' 34,6098''   |
| 03                  | -19,475105 S 19° 28' 30,4626'' / 33,376156 E 33° 22' 34,03956''  |
| 04                  | -19,475128 S 19° 28' 30,75816'' / 33,376126 E 33° 22' 33,843''   |
| 05                  | -19,475308 S 19° 28' 31,12572'' / 33,375964 E 33° 22' 33,53304'' |
| 06                  | -19,475309 S 19° 28' 31,10916'' / 33,375770 E 33° 22' 32,77272'' |
| 07                  | -19,475232 S 19° 28' 30,93636'' / 33,375660 E 33° 22' 32,37492'' |
| 08                  | -19,479211 S 19° 28' 30,58572'' / 33,375609 E 33° 22' 32,21608'' |
| 09                  | -19,475127 S 19° 28' 30,459'' / 33,375442 E 33° 22' 31,39264''   |
| 10                  | -19,474850 S 19° 28' 29,4384 '' / 33,375447 E 33° 22' 31,65456'' |

**C4 – Sussundenga (14/10/2022) – Before rainy season**

| <b>Subsample N°</b> | <b>Coordinates</b>                                              |
|---------------------|-----------------------------------------------------------------|
| 01                  | -19,532735 S 19° 31' 57,97344'' / 33,127758 E 33° 7' 39,92912'' |
| 02                  | -19,532784 S 19° 31' 58,23552'' / 33, 127785 E 33° 7' 40,1736'' |
| 03                  | -19,532928 S 19° 31' 58,7152'' / 33, 127743 E 33° 7' 40,04436'' |
| 04                  | -19,532955 S 19° 31' 58, 386'' / 33, 127755 E 33° 7' 40,20204'' |
| 05                  | -19,532701 S 19° 31' 57,73368'' / 33,127875 E 33° 7' 40,35072'' |
| 06                  | -19,532743 S 19° 31' 57,82872'' / 33,128020 E 33° 7' 40,878''   |
| 07                  | -19,532634 S 19° 31' 57,324'' / 33,127991 E 33° 7' 40,76904''   |
| 08                  | -19,532602 S 19° 31' 57,45184'' / 33,128122 E 33° 7' 41,23812'' |
| 09                  | -19,532621 S 19° 31' 57,79344'' / 33,128307 E 33° 7' 41,99628'' |
| 10                  | -19,532672 S 19° 31' 57,5238'' / 33, 128412 E 33° 7' 42,28176'' |
| 11                  | -19,532645 S 19° 31' 57,1026'' / 33,128302 E 33° 7' 41,8638''   |
| 12                  | -19,532433 S 19° 31' 56,65728'' / 33,128324 E 33° 7' 41,9646''  |
| 13                  | -19,532286 S 19° 31' 56,24764'' / 33,128341 E 33° 7' 42,02652'' |
| 14                  | -19,532252 S 19° 31' 56,14896'' / 33,12822 E 33° 7' 41,59596''  |

|    |                                                               |
|----|---------------------------------------------------------------|
| 15 | -19,532133 S 19° 31` 55,81512" / 33,128250 E 33° 7` 41,72952" |
|----|---------------------------------------------------------------|

**C5 – Sussundenga (14/10/2022) – Before rainy season**

| Subsample N° | Coordinates                                                  |
|--------------|--------------------------------------------------------------|
| 01           | -19,5229393 S 19°31`45,82596" // 33,126412 E 33°7` 35,13108" |
| 02           | -19,529402 S 19°31`46,15572" // 33,126570 E 33°7` 35,65272"  |
| 03           | -19,529541 S 19°31`46,72848" // 33,126539 E 33°7` 35,54112"  |
| 04           | -19,529678 S 19°31`46,8552" // 33,126674 E 33°7` 35,95224"   |
| 05           | -19,529545 S 19°31`46,36992" // 33,126733 E 33°7` 36,2385"   |
| 06           | -19,529412 S 19°31`45,88212" // 33,126805 E 33°7` 36,4962"   |
| 07           | -19,529269 S 19°31`45,39828" // 33,126869 E 33°7` 36,73884"  |
| 08           | -19,529333 S 19°31`45,6006" // 33,126963 E 33°7` 37,06716"   |
| 09           | -19,529373 S 19°31`45,88758" // 33,127077 E 33°7` 37,47612"  |
| 10           | -19,529429 S 19°31`46,29252" // 33,127081 E 33°7` 37,49304"  |
| 11           | -19, 529576 S 19°31`46,4448" // 33,127175 E 33°7` 37,77852"  |
| 12           | -19,529501 S 19°31`45,86088" // 33,127228 E 33°7` 38,04276"  |
| 13           | -19,529256 S 19°31`45,43896" // 33,127265 E 33°7` 38,15293"  |
| 14           | -19, 529317 S 19°31`45,46956" // 33,127403 E 33°7` 38,649"   |
| 15           | -19, 529405 S 19°31`45,75" // 33,127427 E 33°7` 38,62812"    |

**C1 – Manica (14/04/2023) – After rainy season**

| Subsample N° | Coordinates                          |
|--------------|--------------------------------------|
| 01           | S 19° 00' 09.6'' / E 032° 47' 23.4'' |
| 02           | S 19° 00' 09.5'' / E 032° 47' 23.9'' |
| 03           | S 19° 00' 08.8'' / E 032° 47' 24.5'' |
| 04           | S 19° 00' 01.8'' / E 032° 47' 26.5'' |
| 05           | S 19° 00' 00.4'' / E 032° 47' 26.4'' |
| 06           | S 19° 00' 00.6'' / E 032° 47' 25.5'' |
| 07           | S 18° 59' 59.7'' / E 032° 47' 25.9'' |
| 08           | S 18° 59' 59.0'' / E 032° 47' 26.3'' |

|    |                                      |
|----|--------------------------------------|
| 09 | S 18° 59' 58.7'' / E 032° 47' 25.3'' |
| 10 | S 18° 59' 58.9'' / E 032° 47' 24.1'' |
| 11 | S 18° 59' 57.9'' / E 032° 47' 24.2'' |
| 12 | S 18° 59' 57.1'' / E 032° 47' 24.0'' |
| 13 | S 18° 59' 57.3'' / E 032° 47' 23.1'' |
| 14 | S 18° 59' 56.0'' / E 032° 47' 22.4'' |
| 15 | S 18° 59' 54.5'' / E 032° 47' 21.9'' |
| 16 | S 18° 59' 53.5'' / E 032° 47' 21.9'' |
| 17 | S 18° 59' 54.4'' / E 032° 47' 22.6'' |
| 18 | S 18° 59' 55.3'' / E 032° 47' 23.3'' |
| 19 | S 18° 59' 55.3'' / E 032° 47' 24.3'' |
| 20 | S 18° 59' 54.2'' / E 032° 47' 24.4'' |

## **C2 – Manica (14/04/2023) – After rainy season**

| <b>Subsample N°</b> | <b>Coordinates</b>                   |
|---------------------|--------------------------------------|
| 01                  | S 18° 59' 31.4'' / E 032° 46' 54.6'' |
| 02                  | S 18° 59' 31.0'' / E 032° 46' 55.3'' |
| 03                  | S 18° 59' 30.3'' / E 032° 46' 56.5'' |
| 04                  | S 18° 59' 30.2'' / E 032° 46' 55.5'' |
| 05                  | S 18° 59' 30.8'' / E 032° 46' 54.1'' |
| 06                  | S 18° 59' 30.1'' / E 032° 46' 55.5'' |
| 07                  | S 18° 59' 29.6'' / E 032° 46' 56.5'' |
| 08                  | S 18° 59' 29.6'' / E 032° 46' 55.2'' |
| 09                  | S 18° 59' 30.0'' / E 032° 46' 54.0'' |
| 10                  | S 18° 59' 29.5'' / E 032° 46' 54.7'' |
| 11                  | S 18° 59' 28.8'' / E 032° 46' 56.0'' |
| 12                  | S 18° 59' 28.9'' / E 032° 46' 54.8'' |
| 13                  | S 18° 59' 29.3'' / E 032° 46' 53.7'' |
| 14                  | S 18° 59' 28.5'' / E 032° 46' 54.3'' |
| 15                  | S 18° 59' 27.6'' / E 032° 46' 55.5'' |

**C3 – Sussundenga (28/04/2023) – After rainy season**

| Subsample N° | Coordinates                                                      |
|--------------|------------------------------------------------------------------|
| 01           | -19,475083 S 19° 28' 30,30515'' / 33,376284 E 33° 22' 34,62348'' |
| 02           | -19,475132 S 19° 28' 30,62964'' / 33,376288 E 33° 22' 34,63644'' |
| 03           | -19,475157 S 19° 28' 30,56052'' / 33,376205 E 33° 22' 34,33296'' |
| 04           | -19,475153 S 19° 28' 30,53784'' / 33,376024 E 33° 22' 33,95712'' |
| 05           | -19,475227 S 19° 28' 30,81864'' / 33,375995 E 33° 22' 33,58344'' |
| 06           | -19,475322 S 19° 28' 31,15982'' / 33,375936 E 33° 22' 33,38328'' |
| 07           | -19,475389 S 19° 28' 31,4202'' / 33,375810 E 33° 22' 33,026616'' |
| 08           | -19,475387 S 19° 28' 31,43928'' / 33,375728 E 33° 22' 32,0972''  |
| 09           | -19,475363 S 19° 28' 31,4567'' / 33,375631 E 33° 22' 32,27124''  |
| 10           | -19,475365 S 19° 28' 31,15632'' / 33,375489 E 33° 22' 31,72332'' |

**C4 – Sussundenga (28/04/2023) – After rainy season**

| Subsample N° | Coordinates                                                      |
|--------------|------------------------------------------------------------------|
| 01           | -19,532736 S 19° 31' 57,8496'' / 33,12766 E 33° 7' 39,27668''    |
| 02           | -19,532832 S 19° 31' 57,96084'' / 33,12713 E 33° 7' 39,76608''   |
| 03           | -19,532857 S 19° 31' 58,17108'' / 33,127729 E 33° 7' 39,825884'' |
| 04           | -19,532819 S 19° 31' 58,14912'' / 33,127802 E 33° 7' 40,08108''  |
| 05           | -19,532830 S 19° 31' 58,18656'' / 33,127874 E 33° 7' 40,3464''   |
| 06           | -19,532714 S 19° 31' 57,75708'' / 33,127859 E 33° 7' 40,40112''  |
| 07           | -19,532659 S 19° 31' 57,57348'' / 33,127926 E 33° 7' 40,13432''  |
| 08           | -19,5532687 S 19° 31' 57,67176'' / 33,128089 E 33° 7' 41,11896'' |
| 09           | -19,532572 S 19° 31' 57,26172'' / 33,128099 E 33° 7' 41,15784''  |
| 10           | -19,532614 S 19° 31' 57,41796'' / 33,128178 E 33° 7' 41,44188''  |
| 11           | -19,532823 S 19° 31' 57,49932'' / 33,128272 E 33° 7' 41,77356''  |
| 12           | -19,532572 S 19° 31' 57,26748'' / 33,128337 E 33° 7' 42,01644''  |
| 13           | -19,532439 S 19° 31' 56,33448'' / 33,128356 E 33° 7' 42,18784''  |
| 14           | -19,532369 S 19° 31' 56,57376'' / 33,128255 E 33° 7' 41,71728''  |

|    |                                                               |
|----|---------------------------------------------------------------|
| 15 | -19,532264 S 19° 31` 56,15632" / 33,128266 E 33° 7` 41,75796" |
|----|---------------------------------------------------------------|

**C5 – Sussundenga (28/04/2023) – After rainy season**

| N° | Coordinates                                                  |
|----|--------------------------------------------------------------|
| 01 | -19,529359 S 19°31`45,6563036" // 33,126480 E 33°7` 35,3262" |
| 02 | -19,529430 S 19°31`45,07504" // 33,126597 E 33°7` 35,74992"  |
| 03 | -19,529504 S 19°31`46,21368" // 33,126596 E 33°7` 35,7456"   |
| 04 | -19,529475 S 19°31`46,1964" // 33,126708 E 33°7` 36,14985"   |
| 05 | -19,529359 S 19°31`45,70783" // 33,126794 E 33°7` 36,45984"  |
| 06 | -19,529304 S 19°31`45,49656" // 33,126763 E 33°7` 36,34716"  |
| 07 | -19,529235 S 19°31`45,26436" // 33,126835 E 33°7` 36,60528"  |
| 08 | -19,529347 S 19°31`45,7824" // 33,126813 E 33°7` 36,67008"   |
| 09 | -19,529617 S 19°31`46,36123" // 33,126561 E 33°7` 36,70032"  |
| 10 | -19,529501 S 19°31`46,18854" // 33,127032 E 33°7` 37,31376"  |
| 11 | -19,529391 S 19°31`45,84864" // 33,127105 E 33°7` 37,57872"  |
| 12 | -19,529434 S 19°31`45,97532" // 33,127204 E 33°7` 37,93554"  |
| 13 | -19,529475 S 19°31`46,11288" // 33,127286 E 33°7` 38,2278"   |
| 14 | -19,529373 S 19°31`45,75252" // 33,127318 E 33°7` 38,343"    |
| 15 | -19,529272 S 19°31`45,37704" // 33,127421 E 33°7` 38,75452"  |
